# Supplementary material for: Large Stokes shifted quaternary copper cadmium sulfide selenide quantum dot waveguides
Source: Royal Society of Chemistry journal article supplement (doi:10.1039/d1tc01844b), 2021-01-01
Supplement: d1tc01844b1.pdf [file d1tc01844b1.pdf]

## Electronic Supplementary Information

# Large Stokes Shifted Quaternary Copper Cadmium Sulfide Selenide Quantum Dots Waveguides

*Dipanwita Roy,<sup>a</sup> Piyush Kanti Sarkar,<sup>a</sup> Amit Dalui,<sup>b</sup> Uttam Kumar Ghorai,<sup>c</sup>*

*Dharmendra K. Gupta,<sup>d</sup> and Somobrata Acharya\*,<sup>a,e</sup>*

<sup>a</sup>School of Applied and Interdisciplinary Sciences, Indian Association for the Cultivation of Science, Kolkata 700032, India.

<sup>b</sup>Department of Chemistry, Jogamaya Devi College, Kolkata 700026, India.

<sup>c</sup>Department of Industrial & Applied Chemistry, Swami Vivekananda Research Centre, Ramkrishna Mission Vidyamandir, Belur Math, Howrah 711202, India

<sup>d</sup>Ministry of Environment, Forest and Climate Change, New Delhi 110003, India

<sup>e</sup>Technical research centre (TRC), Indian Association for the Cultivation of Science, Kolkata 700032, India.

Corresponding author: [camsa2@iacs.res.in](mailto:camsa2@iacs.res.in)

### Contents:

1. FFT pattern ..... Figure S1
2. EDX spectrum of QDs..... Figure S2
3. Elemental composition ratio from EDX spectra.....Table S1
4. TGA plot..... Figure S3
5. Data point from CV.....Table S2

6. TEM images of 180 min annealed sample.....Figure S4
7. QY value with annealing time.....Table S3
8. Fitting parameters of TCSPC.....Table S4
9. Radiative and non-radiative rate .....Table S5
10. PL spectra at the edge and face of the waveguide.....Figure S5

**Supporting Figures:**

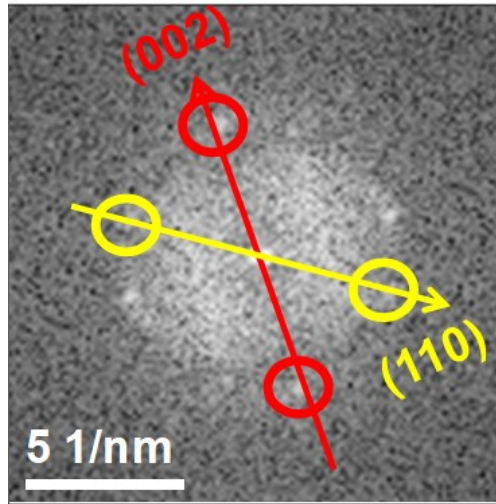

**Figure S1.** The FFT pattern obtained from the HRTEM showing the single-crystalline nature of CCSS QDs.

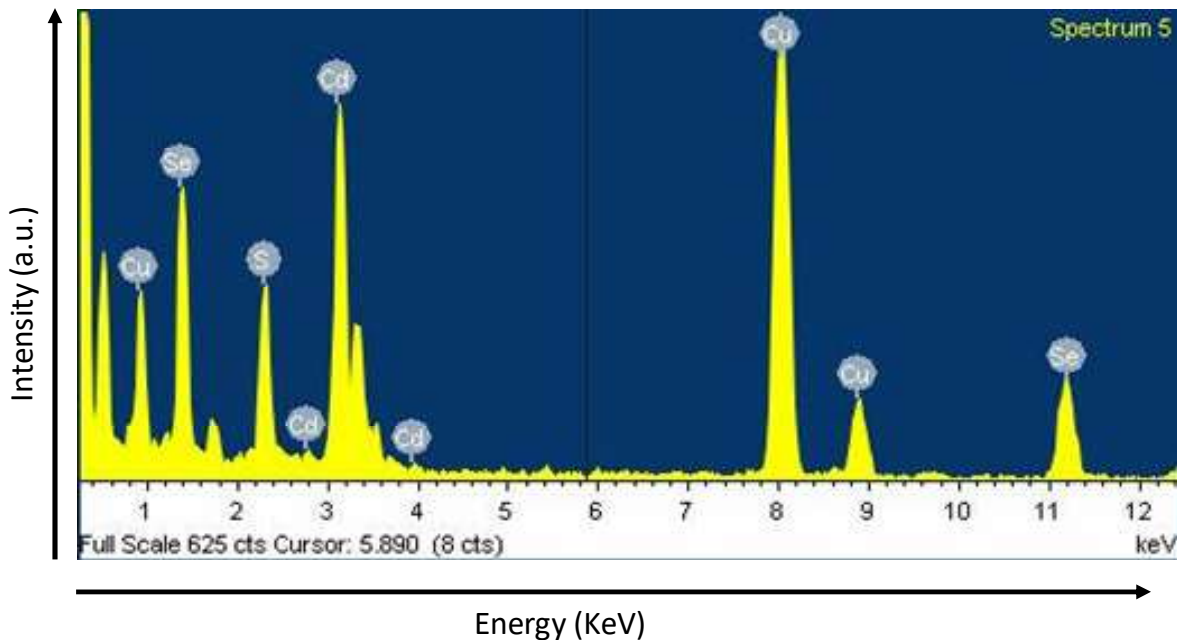

**Figure S2.** EDX spectrum of CCSS QDs showing the elemental composition of the QDs.

**Table S1.** Cu/Cd elemental ratio from ICP analysis with increasing annealing time which shows the gradual increase of Cu/Cd ratio with annealing time. The Cu/Cd ratio reaches the maximum value at 90 min annealing and the decreases upon increasing the annealing time. EDX analyses show the atomic percentage in the CCSS QDs synthesized at 90 min. The EDX reveals Cu/Cd elemental ratio of 1.67, which is close to ICP analysis at 90 min. Elemental analyses from XPS showing Cu/Cd elemental ratio of 1.55 at 90 min, which is close to ICP and EDX analyses.

| <b>ICP</b>                  |                    | <b>EDX</b>     |                 | <b>XPS</b>         |                |                 |                    |
|-----------------------------|--------------------|----------------|-----------------|--------------------|----------------|-----------------|--------------------|
| <b>Annealing Time (min)</b> | <b>Cu/Cd ratio</b> | <b>Element</b> | <b>Atomic %</b> | <b>Cu/Cd ratio</b> | <b>Element</b> | <b>Atomic %</b> | <b>Cu/Cd ratio</b> |
| <b>10</b>                   | 0.37               | Cu             | 45              |                    | Cu             | 43              |                    |
| <b>20</b>                   | 0.43               |                |                 |                    |                |                 |                    |
| <b>40</b>                   | 0.81               | Cd             | 27              |                    | Cd             | 27              |                    |
| <b>60</b>                   | 0.94               |                |                 | <b>1.67</b>        |                |                 | <b>1.55</b>        |
| <b>90</b>                   | <b>1.56</b>        | S              | 16              |                    | S              | 17              |                    |
| <b>120</b>                  | 1.31               |                |                 |                    |                |                 |                    |
| <b>150</b>                  | 1.02               | Se             | 12              |                    | Se             | 14              |                    |
| <b>180</b>                  | 1.02               |                |                 |                    |                |                 |                    |

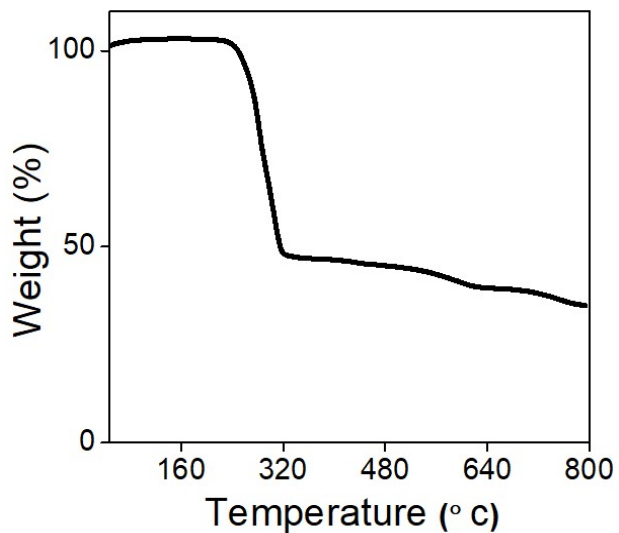

**Figure S3.** Thermogravimetric analysis showing the thermal stability of CCSS QDs.

**Table S2.** Cathodic and anodic peaks for CCSS and CSS QDs obtained from CV plots.

| Material | Anodic Peak (A1) | Cathodic Peak (C1) | Anodic Peak for Cu (A2') | Cathodic Peak for Cu (C2') |
|----------|------------------|--------------------|--------------------------|----------------------------|
| CCSS QDs | -5.67 eV         | -3.0 eV            | -4.94 eV                 | -3.01 eV                   |
| CSS QDs  | -5.97 eV         | -3.11 eV           | Absent                   | Absent                     |

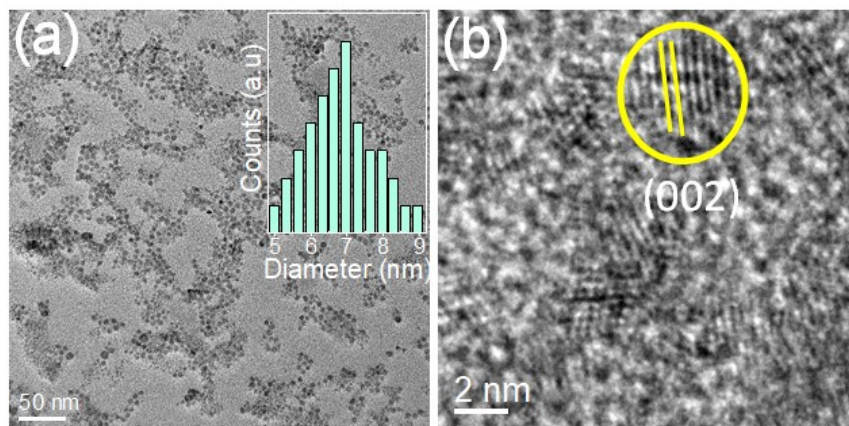

**Figure S4.** (a) TEM images of 180 min annealed QDs. The inset shows size distribution histogram. (b) HRTEM image shows lattice spacing's of  $0.36 \pm 0.02$  nm which matches with (002) planes.

**Table S3:** PLQYs at different annealing time showing the maximum for the 90 min annealed QDs.

| Annealing Time (min) | PLQY (%) |
|----------------------|----------|
| 10                   | 12.03    |
| 20                   | 17.4     |
| 40                   | 26.2     |
| 60                   | 39       |
| 90                   | 62       |
| 120                  | 20       |
| 150                  | 10       |
| 180                  | 2        |

**Table S4:** TCSPC lifetime components of CCSS QDs along with the fitting parameters at different annealing time.

| Annealing time (min) | $\tau_1$ (ns) | $\tau_2$ (ns) | $\tau_3$ (ns) | A <sub>1</sub> | A <sub>2</sub> | A <sub>3</sub> | $\tau_{avg}$ (ns) |
|----------------------|---------------|---------------|---------------|----------------|----------------|----------------|-------------------|
| 20                   | 14.09         | 91.3          | 265           | 0.44           | 0.42           | 0.137          | 80                |
| 60                   | 16.5          | 115.7         | 333.6         | 0.37           | 0.46           | 0.17           | 115.3             |
| 90                   | 6.74          | 45.2          | 136.6         | 0.49           | 0.38           | 0.12           | 37.5              |
| 150                  | 28.6          | 146.3         | 435.5         | 0.25           | 0.5            | 0.24           | 187               |
| 180                  | 106.8         | 396.5         | -             | 0.54           | 0.46           | -              | 237               |

**Table S5.** Rate of radiative and non-radiative relaxation of CCSS QDs with annealing time.

| Annealing time (min) | Radiative rate ( $k_{rad}$ ) $10^6 \times S^{-1}$ | Non-radiative rate ( $k_{nrad}$ ) $10^6 \times S^{-1}$ |
|----------------------|---------------------------------------------------|--------------------------------------------------------|
| 20                   | 2.18                                              | 10.32                                                  |
| 60                   | 3.4                                               | 5.3                                                    |
| 90                   | 16.5                                              | 10.1                                                   |
| 150                  | 0.534                                             | 4.8                                                    |
| 180                  | 0.084                                             | 4.1                                                    |

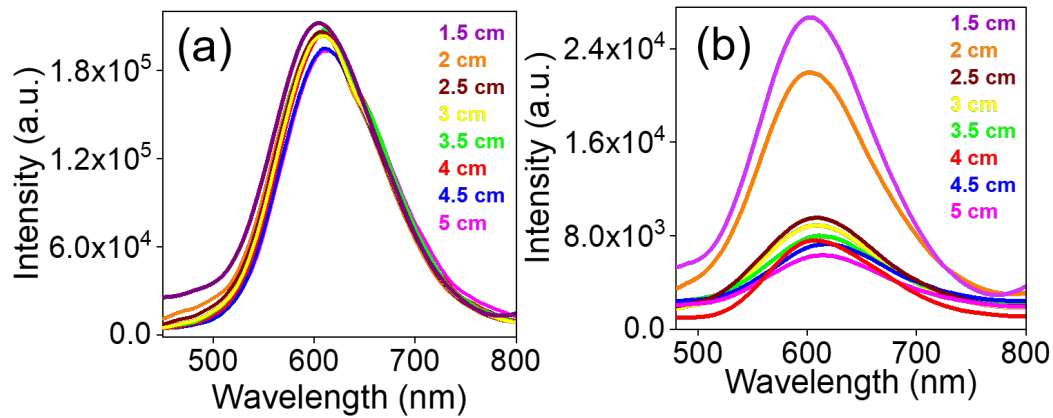

**Figure S5.** PL spectra of the waveguide slab at different distances from the excitation source collected at (a) edge and (b) face of the slab.
